# Supplementary material for: Association of Polymorphic Variants of miRNA Processing Genes with Larynx Cancer Risk in a Polish Population
Source: Hindawi journal article supplement (doi:10.1155/2015/298378), 2015-01-01
Supplement: f1 [file 298378.f1.pdf]

Table 6. An association of the miRNA processing genes single nucleotide polymorphisms with head and neck cancer risk by smoking status.

| GENE/<br>RS NO. | GENOTYPE | Non<br>smokers | Smokers | Odds<br>Ratio | .95<br>Confidence<br>Intervals |             | p*     |
|-----------------|----------|----------------|---------|---------------|--------------------------------|-------------|--------|
|                 |          | NO.            | NO.     |               | Lower Limit                    | Upper Limit |        |
| <b>DROSHA</b>   |          |                |         |               |                                |             |        |
| <b>6877842</b>  | CC       | 0              | 6       | Ref.          |                                |             |        |
|                 | CG       | 8              | 41      | NA            |                                |             |        |
|                 | GG       | 3              | 70      | NA            |                                |             |        |
| <b>DICER1</b>   |          |                |         |               |                                |             |        |
| <b>3742330</b>  | AA       | 3              | 20      | Ref.          |                                |             |        |
|                 | AG       | 7              | 93      | 1.9929        | 0.474                          | 8.3795      | 0.2791 |
|                 | GG       | 0              | 0       | NA            |                                |             |        |
| <b>13078</b>    | AA       | 0              | 7       | Ref.          |                                |             |        |
|                 | AT       | 4              | 42      | NA            | 0.2983                         | 3.9161      | 0.5897 |
|                 | TT       | 7              | 68      | NA            |                                |             |        |
| <b>DGCR8</b>    |          |                |         |               |                                |             |        |
| <b>1640299</b>  | GG       | 0              | 6       | Ref.          |                                |             |        |
|                 | GT       | 4              | 43      | NA            |                                |             |        |
|                 | TT       | 5              | 55      | NA            |                                |             |        |
| <b>3757</b>     | AA       | 0              | 4       | Ref.          |                                |             |        |
|                 | AG       | 7              | 82      | NA            |                                |             |        |
|                 | GG       | 3              | 26      | NA            |                                |             |        |
| <b>417309</b>   | AA       | 1              | 12      | Ref.          |                                |             |        |
|                 | AG       | 3              | 29      | 0.8056        | 0.076                          | 8.5409      | 0.6741 |
|                 | GG       | 6              | 61      | 0.8472        | 0.0933                         | 7.6897      | 0.6821 |
| <b>RAN</b>      |          |                |         |               |                                |             |        |
| <b>14035</b>    | CC       | 6              | 67      | Ref.          |                                |             |        |
|                 | CT       | 1              | 31      | 2.7761        | 0.3203                         | 24.0583     | 0.3109 |
|                 | TT       | 1              | 4       | 0.3582        | 0.0343                         | 3.7378      | 0.3832 |
| <b>TARBP2</b>   |          |                |         |               |                                |             |        |
| <b>784567</b>   | AA       | 1              | 6       | Ref.          |                                |             |        |
|                 | AG       | 3              | 67      | 3.7222        | 0.3335                         | 41.5432     | 0.3224 |
|                 | GG       | 6              | 45      | 1.25          | 0.1276                         | 12.2453     | 0.6149 |
| <b>XPO5</b>     |          |                |         |               |                                |             |        |
| <b>11077</b>    | GG       | 2              | 24      | Ref.          |                                |             |        |
|                 | GT       | 6              | 56      | 0.7778        | 0.1464                         | 4.1327      | 0.5623 |
|                 | TT       | 3              | 33      | 0.9167        | 0.142                          | 5.9173      | 0.6535 |

\*All p values are for Fisher Exact Probability Test due to low sample sizes.

Table 7. An association of the miRNA processing genes single nucleotide polymorphisms with head and neck cancer risk modified by smoking duration.

| GENE/<br>RS NO. | GENO<br>TYPE | Non<br>smokers<br>NO. | PATIE<br>NTS<br>NO. | Up to 10 years |                             |                 |        | 20-40 years         |               |                             |                 |        | More than 40     |               |                             |                 |        |
|-----------------|--------------|-----------------------|---------------------|----------------|-----------------------------|-----------------|--------|---------------------|---------------|-----------------------------|-----------------|--------|------------------|---------------|-----------------------------|-----------------|--------|
|                 |              |                       |                     | Odds<br>Ratio  | .95 Confidence<br>Intervals |                 | p*     | PATIE<br>NTS<br>NO. | Odds<br>Ratio | .95 Confidence<br>Intervals |                 | p*     | PATI<br>ENT<br>S | Odds<br>Ratio | .95 Confidence<br>Intervals |                 | p*     |
|                 |              |                       |                     |                | Lower L<br>imit             | Upper Li<br>mit |        |                     |               | Lower L<br>imit             | Upper Lim<br>it |        |                  |               | Lower L<br>imit             | Upper Lim<br>it |        |
| <b>DROSHA</b>   |              |                       |                     |                |                             |                 |        |                     |               |                             |                 |        |                  |               |                             |                 |        |
| 6877842         | CC           | 0                     | 4                   | Ref.           |                             |                 |        | 0                   | Ref.          |                             |                 |        | 2                | Ref.          |                             |                 |        |
|                 | CG           | 8                     | 11                  | NA             |                             |                 |        | 15                  | NA            |                             |                 |        | 15               | NA            |                             |                 |        |
|                 | GG           | 3                     | 31                  | NA             |                             |                 |        | 21                  | NA            |                             |                 |        | 17               | NA            |                             |                 |        |
| <b>DICER1</b>   |              |                       |                     |                |                             |                 |        |                     |               |                             |                 |        |                  |               |                             |                 |        |
| 3742330         | AA           | 3                     | 9                   | Ref.           |                             |                 |        | 4                   | Ref.          |                             |                 |        | 7                | Ref.          |                             |                 |        |
|                 | AG           | 7                     | 37                  | 1.7619         | 0.3791                      | 8.1876          | 0.3628 | 31                  | 3.3214        | 0.6026                      | 18.308          | 0.1722 | 24               | 0.6806        | 0.1383                      | 3.3479          | 0.4639 |
|                 | GG           | 0                     | 0                   | NA             |                             |                 |        | 0                   | NA            |                             |                 |        | 0                | NA            |                             |                 |        |
| 13078           | AA           | 0                     | 1                   | Ref.           |                             |                 |        | 4                   | Ref.          |                             |                 |        | 2                | Ref.          |                             |                 |        |
|                 | AT           | 4                     | 16                  | NA             |                             |                 |        | 15                  | NA            |                             |                 |        | 11               | NA            |                             |                 |        |
|                 | TT           | 7                     | 28                  | NA             |                             |                 |        | 18                  | NA            |                             |                 |        | 21               | NA            |                             |                 |        |
| <b>DGCR8</b>    |              |                       |                     |                |                             |                 |        |                     |               |                             |                 |        |                  |               |                             |                 |        |
| 1640299         | GG           | 0                     | 2                   | Ref.           |                             |                 |        | 3                   | Ref.          |                             |                 |        | 1                | Ref.          |                             |                 |        |
|                 | GT           | 4                     | 19                  | NA             |                             |                 |        | 11                  | NA            |                             |                 |        | 13               | NA            |                             |                 |        |
|                 | TT           | 5                     | 19                  | NA             |                             |                 |        | 18                  | NA            |                             |                 |        | 18               | NA            |                             |                 |        |
| 3757            | AA           | 0                     | 2                   | Ref.           |                             |                 |        | 1                   | Ref.          |                             |                 |        | 1                | Ref.          |                             |                 |        |
|                 | AG           | 7                     | 31                  | NA             |                             |                 |        | 27                  | NA            |                             |                 |        | 23               | NA            |                             |                 |        |
|                 | GG           | 3                     | 9                   | NA             |                             |                 |        | 8                   | NA            |                             |                 |        | 9                | NA            |                             |                 |        |
| 417309          | AA           | 1                     | 5                   | Ref.           |                             |                 |        | 5                   | Ref.          |                             |                 |        | 2                | Ref.          |                             |                 |        |
|                 | AG           | 3                     | 9                   | 0.6            | 0.0486                      | 7.4083          | 0.5931 | 8                   | 0.5333        | 0.0427                      | 6.6553          | 0.5546 | 11               | 1.8333        | 0.1209                      | 27.7987         | 0.5794 |
|                 | GG           | 6                     | 19                  | 0.6333         | 0.0613                      | 6.5422          | 0.5869 | 23                  | 0.7667        | 0.0748                      | 7.86            | 0.6559 | 18               | 0.3636        | 0.0693                      | 1.9094          | 0.2098 |
| <b>RAN</b>      |              |                       |                     |                |                             |                 |        |                     |               |                             |                 |        |                  |               |                             |                 |        |
| 14035           | CC           | 6                     | 27                  | Ref.           |                             |                 |        | 19                  | Ref.          |                             |                 |        | 21               | Ref.          |                             |                 |        |
|                 | CT           | 1                     | 6                   | 1.3333         | 0.1344                      | 13.2251         | 0.6449 | 13                  | 4.1053        | 0.4408                      | 38.2355         | 0.1924 | 12               | 3.4286        | 0.3677                      | 31.9713         | 0.2540 |
|                 | TT           | 1                     | 3                   | 0.6667         | 0.0587                      | 7.5722          | 0.5850 | 0                   | NA            |                             |                 |        | 1                | 0.0952        | 0.0083                      | 1.0908          | 0.0627 |
| <b>TARBP2</b>   |              |                       |                     |                |                             |                 |        |                     |               |                             |                 |        |                  |               |                             |                 |        |
| 784567          | AA           | 1                     | 5                   | Ref.           |                             |                 |        | 1                   | Ref.          |                             |                 |        | 0                | Ref.          |                             |                 |        |
|                 | AG           | 3                     | 24                  | 1.6            | 0.1367                      | 18.7236         | 0.5711 | 20                  | 6.6667        | 0.3234                      | 137.4111        | 0.2999 | 22               | NA            |                             |                 |        |
|                 | GG           | 6                     | 16                  | 0.5333         | 0.0512                      | 5.5541          | 0.5221 | 16                  | 2.6667        | 0.1429                      | 49.7588         | 0.5072 | 12               | NA            |                             |                 |        |
| <b>XPO5</b>     |              |                       |                     |                |                             |                 |        |                     |               |                             |                 |        |                  |               |                             |                 |        |
| 11077           | GG           | 2                     | 9                   | Ref.           |                             |                 |        | 8                   | Ref.          |                             |                 |        | 7                | Ref.          |                             |                 |        |
|                 | GT           | 6                     | 20                  | 0.7407         | 0.1245                      | 4.4068          | 0.5558 | 19                  | 0.7917        | 0.1307                      | 4.7939          | 0.5888 | 17               | 0.8095        | 0.1303                      | 5.0285          | 0.6018 |
|                 | TT           | 3                     | 12                  | 0.8889         | 0.1219                      | 6.4834          | 0.6543 | 9                   | 0.75          | 0.0988                      | 5.693           | 0.5939 | 10               | 0.9524        | 0.1247                      | 7.2755          | 0.6842 |

\*All p values are for Fisher Exact Probability Test due to low sample sizes.

Table 8. An association of the miRNA processing genes single nucleotide polymorphisms with head and neck cancer risk modified by number of cigarettes smoked per day.

| GENE/<br>RS NO. | GENOTYPE | Non<br>smokers<br>NO. | Up to 20 cigarettes per day |               |                                               |             |          | More than 20 cigarettes per day |               |                                               |             |          |
|-----------------|----------|-----------------------|-----------------------------|---------------|-----------------------------------------------|-------------|----------|---------------------------------|---------------|-----------------------------------------------|-------------|----------|
|                 |          |                       | NO.                         | Odds<br>Ratio | .95<br>Confidence<br>Intervals<br>Lower Limit | Upper Limit | p*       | NO.                             | Odds<br>Ratio | .95<br>Confidence<br>Intervals<br>Lower Limit | Upper Limit | p*       |
| <b>DROSHA</b>   |          |                       |                             |               |                                               |             |          |                                 |               |                                               |             |          |
| 6877842         | CC       | 0                     | 1                           | Ref.          |                                               |             |          | 5                               | Ref.          |                                               |             |          |
|                 | CG       | 8                     | 11                          | NA            |                                               |             |          | 30                              | NA            |                                               |             |          |
|                 | GG       | 3                     | 13                          | NA            |                                               |             |          | 57                              | NA            |                                               |             |          |
| <b>DICER1</b>   |          |                       |                             |               |                                               |             |          |                                 |               |                                               |             |          |
| 3742330         | AA       | 3                     | 8                           | Ref.          |                                               |             |          | 12                              | Ref.          |                                               |             |          |
|                 | AG       | 7                     | 17                          | 0.9107        | 0.1853                                        | 4.4763      | 0.6204 F | 76                              | 2.7143        | 0.6159                                        | 11.9625     | 0.1785   |
|                 | GG       | 0                     | 0                           | NA            |                                               |             |          | 0                               | NA            |                                               |             |          |
| 13078           | AA       | 0                     | 2                           | Ref.          |                                               |             |          | 5                               | Ref.          |                                               |             |          |
|                 | AT       | 4                     | 7                           | NA            |                                               |             |          | 35                              | NA            |                                               |             |          |
|                 | TT       | 7                     | 18                          | NA            |                                               |             |          | 50                              | NA            |                                               |             |          |
| <b>DGCR8</b>    |          |                       |                             |               |                                               |             |          |                                 |               |                                               |             |          |
| 1640299         | GG       | 0                     | 1                           | Ref.          |                                               |             |          | 5                               | Ref.          |                                               |             |          |
|                 | GT       | 4                     | 14                          | NA            |                                               |             |          | 29                              | NA            |                                               |             |          |
|                 | TT       | 5                     | 9                           | NA            |                                               |             |          | 46                              | NA            |                                               |             |          |
| 3757            | AA       | 0                     | 0                           | Ref.          |                                               |             |          | 4                               | Ref.          |                                               |             |          |
|                 | AG       | 7                     | 15                          | NA            |                                               |             |          | 67                              | NA            |                                               |             |          |
|                 | GG       | 3                     | 8                           | NA            |                                               |             |          | 18                              | NA            |                                               |             |          |
| 417309          | AA       | 1                     | 5                           | Ref.          |                                               |             |          | 7                               | Ref.          |                                               |             |          |
|                 | AG       | 3                     | 7                           | 0.4667        | 0.0369                                        | 5.9028      | 0.5109 F | 22                              | 1.0476        | 0.0934                                        | 11.755      | 0.6908 F |
|                 | GG       | 6                     | 11                          | 0.3667        | 0.0344                                        | 3.9079      | 0.3822 F | 50                              | 1.1905        | 0.1242                                        | 11.4082     | 0.6266 F |
| <b>RAN</b>      |          |                       |                             |               |                                               |             |          |                                 |               |                                               |             |          |
| 14035           | CC       | 6                     | 12                          | Ref.          |                                               |             |          | 55                              | Ref.          |                                               |             |          |
|                 | CT       | 1                     | 9                           | 0.0556        | 0.0056                                        | 0.5468      | 0.0051 F | 22                              | 2.4           | 0.2729                                        | 21.1044     | 0.3782 F |
|                 | TT       | 1                     | 1                           | 0.5           | 0.0264                                        | 9.4579      | 0.5894 F | 3                               | 0.3273        | 0.0292                                        | 3.6621      | 0.3733 F |
| <b>TARBP2</b>   |          |                       |                             |               |                                               |             |          |                                 |               |                                               |             |          |
| 784567          | AA       | 1                     | 1                           | Ref.          |                                               |             |          | 5                               | Ref.          |                                               |             |          |
|                 | AG       | 3                     | 14                          | 4.6667        | 0.2234                                        | 97.5022     | 0.3859 F | 53                              | 0.283         | 0.0246                                        | 3.2533      | 0.3415 F |
|                 | GG       | 6                     | 13                          | 2.1667        | 0.115                                         | 40.8129     | 0.5666 F | 32                              | 0.3019        | 0.0705                                        | 1.2918      | 0.0929 F |
| <b>XPO5</b>     |          |                       |                             |               |                                               |             |          |                                 |               |                                               |             |          |
| 11077           | GG       | 2                     | 7                           | Ref.          |                                               |             |          | 17                              | Ref.          |                                               |             |          |
|                 | GT       | 6                     | 13                          | 0.619         | 0.0978                                        | 3.9188      | 0.4844 F | 43                              | 0.8431        | 0.1546                                        | 4.5968      | 0.6052 F |
|                 | TT       | 3                     | 6                           | 0.5714        | 0.0703                                        | 4.6446      | 0.5 F    | 27                              | 1.0588        | 0.1601                                        | 7.0041      | 0.6522 F |

\*All p values are for Fisher Exact Probability Test due to low sample sizes.
